# Supplementary material for: Neuroimaging Findings in a Patient with Anti-IgLON5 Disease: Cerebrospinal Fluid Dynamics Abnormalities
Source: MDPI journal article supplement (doi:10.3390/diagnostics12040849), 2022-03-30
Supplement: s1 [file s1]

*Interesting Images*

## Neuroimaging Findings in a Patient with Anti-IgLON5 Disease: Cerebrospinal Fluid Dynamics Abnormalities

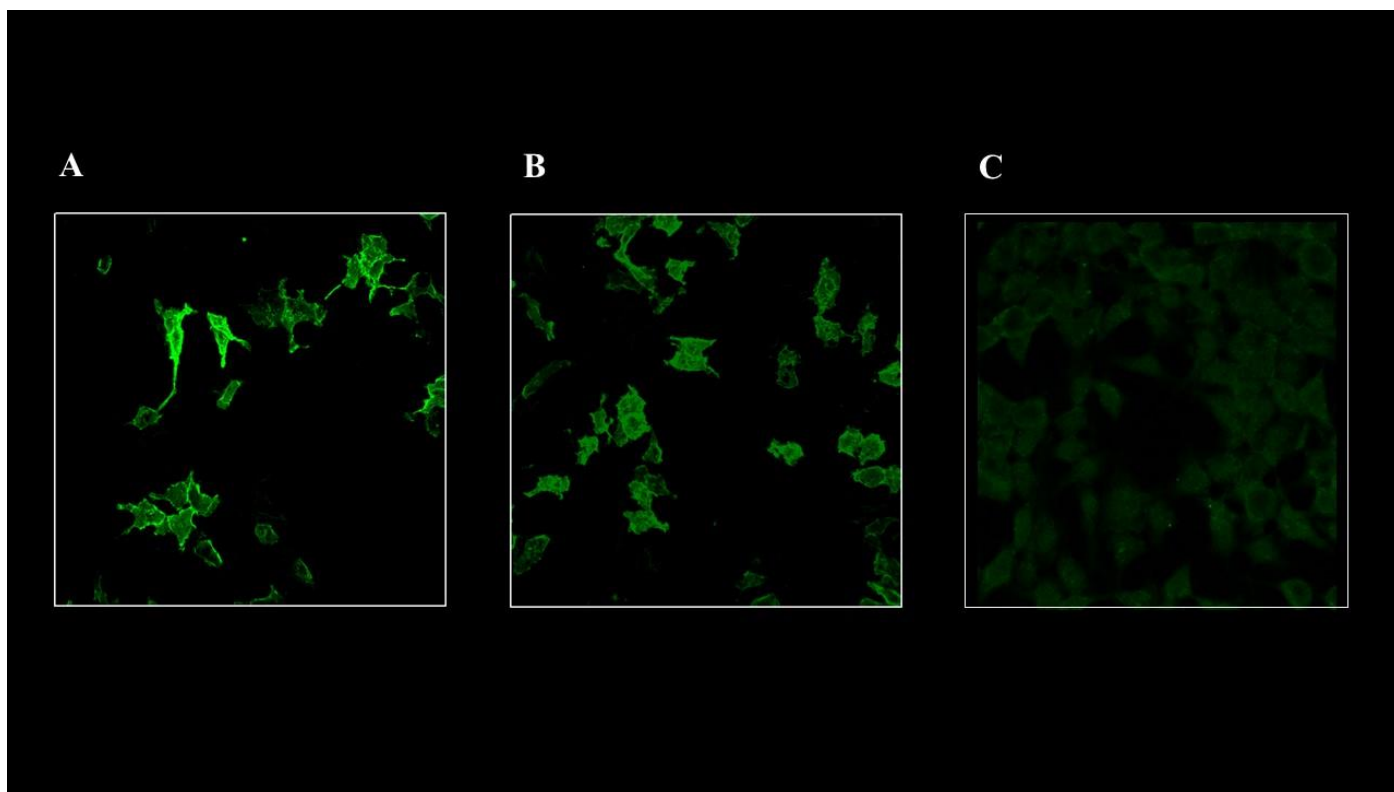

**Figure S1.** Detection of IgLON5 antibodies using an indirect immunofluorescence cell-based assay (Euro-immun, Lubeck, Germany); patient serum (a) and CSF (b) immunoreactivity on HEK293 Ig-LON5 transfected cells; no serum immunoreactivity on HEK 293 nontransfected cells (c).
